# Supplementary material for: Intact ribosomes drive the formation of protein quinary structure
Source: PubMed Central journal article supplement (PMC7182177; doi:10.1371/journal.pone.0232015), 2020-04-24
Supplement: pone.0232015.s001.pdf [file pone.0232015.s001.pdf]

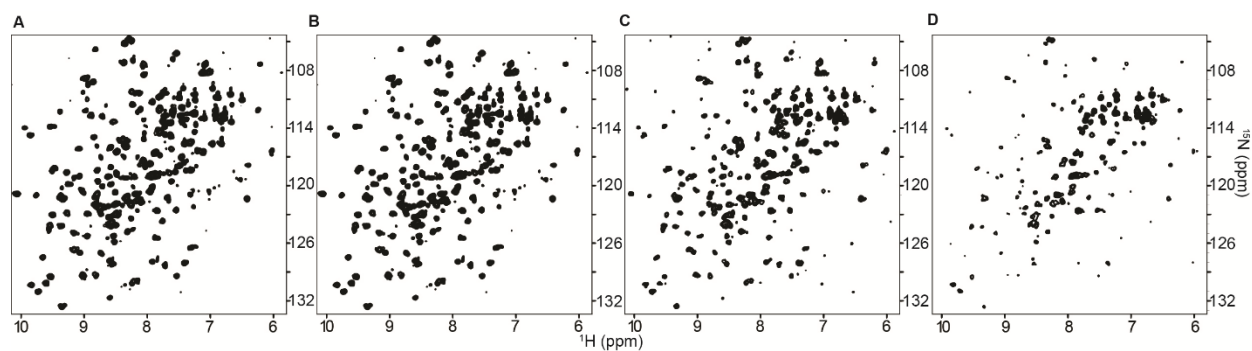

Figure S1. Increasing concentration of ribosomes broadens NMR spectral crosspeaks.  $^1\text{H}$ - $^{15}\text{N}$  HSQC NMR spectra of  $10\ \mu\text{M}$  purified [ $U$ - $^{15}\text{N}$ ]  $\gamma\text{D}$ -crystallin in buffer containing  $50\ \text{mM}$  NaCl. A) No ribosomes. B)  $2\ \mu\text{M}$  ribosomes; C)  $4\ \mu\text{M}$  ribosomes; D)  $6\ \mu\text{M}$  ribosomes. The data were collected at RT on a Bruker Avance II spectrometer operating at a  $^1\text{H}$  frequency of  $700\ \text{MHz}$  with 512 scans per transient; 1024 and 128 complex points were collected in  $^1\text{H}$  and  $^{15}\text{N}$  dimensions and multiplied by a cosine-bell window function and zero-filled to 2048 and 256 points prior to Fourier transformation. The corresponding sweep-widths were  $12\ \text{ppm}$  and  $35\ \text{ppm}$  in  $^1\text{H}$  and  $^{15}\text{N}$  dimensions, respectively.
