# Supplementary material for: Intact ribosomes drive the formation of protein quinary structure
Source: PubMed Central journal article supplement (PMC7182177; doi:10.1371/journal.pone.0232015), 2020-04-24
Supplement: pone.0232015.s002.pdf [file pone.0232015.s002.pdf]

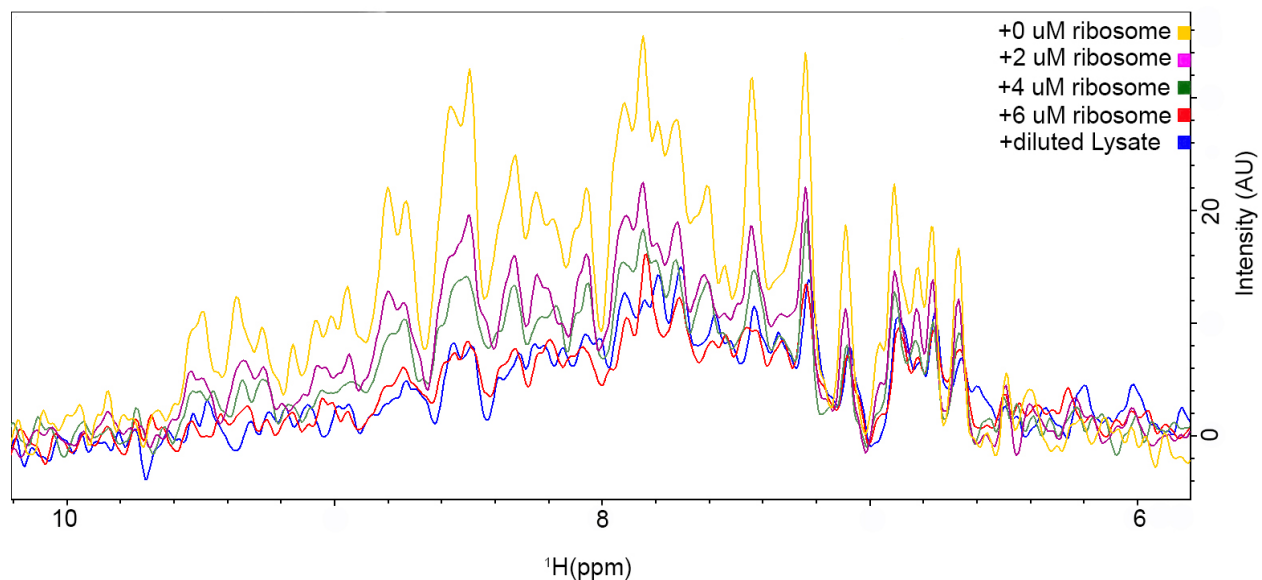

Figure S2. Peak broadening of the  $^1\text{H}$ - $^{15}\text{N}$  HSQC spectrum of [ $U$ - $^{15}\text{N}$ ]  $\gamma\text{D}$ -crystallin with diluted lysate is consistent with the presence of  $\sim 5 \mu\text{M}$  of ribosomes in the sample. Overlay of the amide envelopes of  $^1\text{H}$ - $^{15}\text{N}$  HSQC NMR spectra of  $10 \mu\text{M}$  purified [ $U$ - $^{15}\text{N}$ ]  $\gamma\text{D}$ -crystallin in buffer containing no ribosomes (yellow);  $2 \mu\text{M}$  ribosomes (purple);  $4 \mu\text{M}$  ribosomes (green);  $6 \mu\text{M}$  ribosomes (red); diluted lysate (blue). The data were collected at RT on a Bruker Avance II spectrometer operating at a  $^1\text{H}$  frequency of 700 MHz with 512 scans per transient; 1024 and 128 complex points were collected in  $^1\text{H}$  and  $^{15}\text{N}$  dimensions. The first transient of each spectrum was extracted by using “rser 1” command and multiplied by a cosine-bell window function and zero-filled to 2048 points prior to Fourier transformation. The corresponding sweep-widths were 12 ppm and 35 ppm in  $^1\text{H}$  and  $^{15}\text{N}$  dimensions, respectively.
