# Supplementary material for: Intact ribosomes drive the formation of protein quinary structure
Source: PubMed Central journal article supplement (PMC7182177; doi:10.1371/journal.pone.0232015), 2020-04-24
Supplement: pone.0232015.s003.pdf [file pone.0232015.s003.pdf]

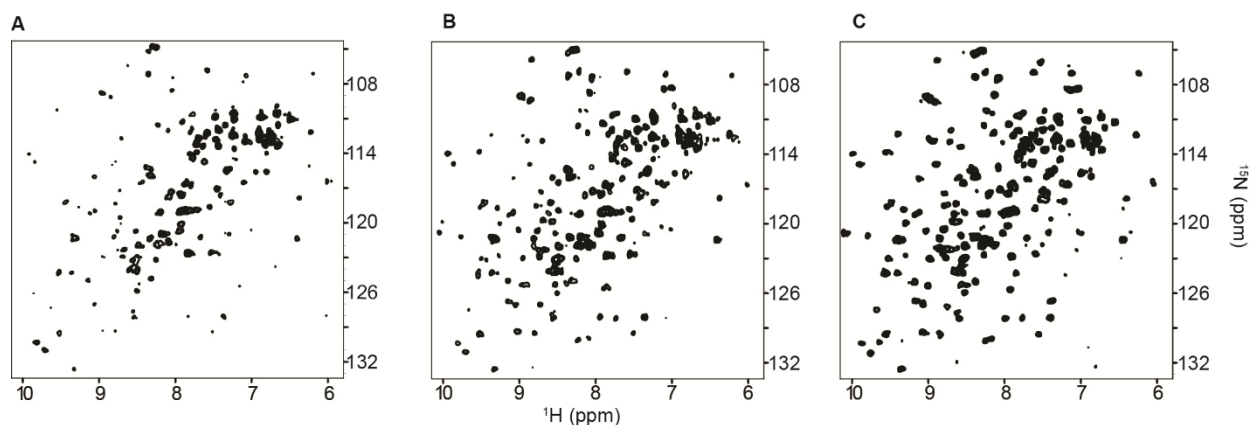

Figure S3. Increasing salt concentration restores NMR spectral crosspeaks.  $^1\text{H}$ - $^{15}\text{N}$  HSQC NMR spectra of 10  $\mu\text{M}$  purified [ $U$ - $^{15}\text{N}$ ]  $\gamma\text{D}$ -crystallin in NMR buffer containing: A) 50 mM NaCl; B) 200 mM NaCl; C) 500 mM NaCl. To decrease the influence of ionic strength on the quality of NMR spectra, the samples were placed into 3 mm NMR tubes (Norell, Inc). The data were collected at RT on a Bruker Avance II spectrometer operating at a  $^1\text{H}$  frequency of 700 MHz with 512 scans per transient; 1024 and 128 complex points were collected in  $^1\text{H}$  and  $^{15}\text{N}$  dimensions and multiplied by a cosine-bell window function and zero-filled to 2048 and 256 points prior to Fourier transformation. The corresponding sweep-widths were 12 ppm and 35 ppm in  $^1\text{H}$  and  $^{15}\text{N}$  dimensions, respectively.
