# Supplementary material for: Intact ribosomes drive the formation of protein quinary structure
Source: PubMed Central journal article supplement (PMC7182177; doi:10.1371/journal.pone.0232015), 2020-04-24
Supplement: pone.0232015.s005.pdf [file pone.0232015.s005.pdf]

Raw Image  
for Figure 2A

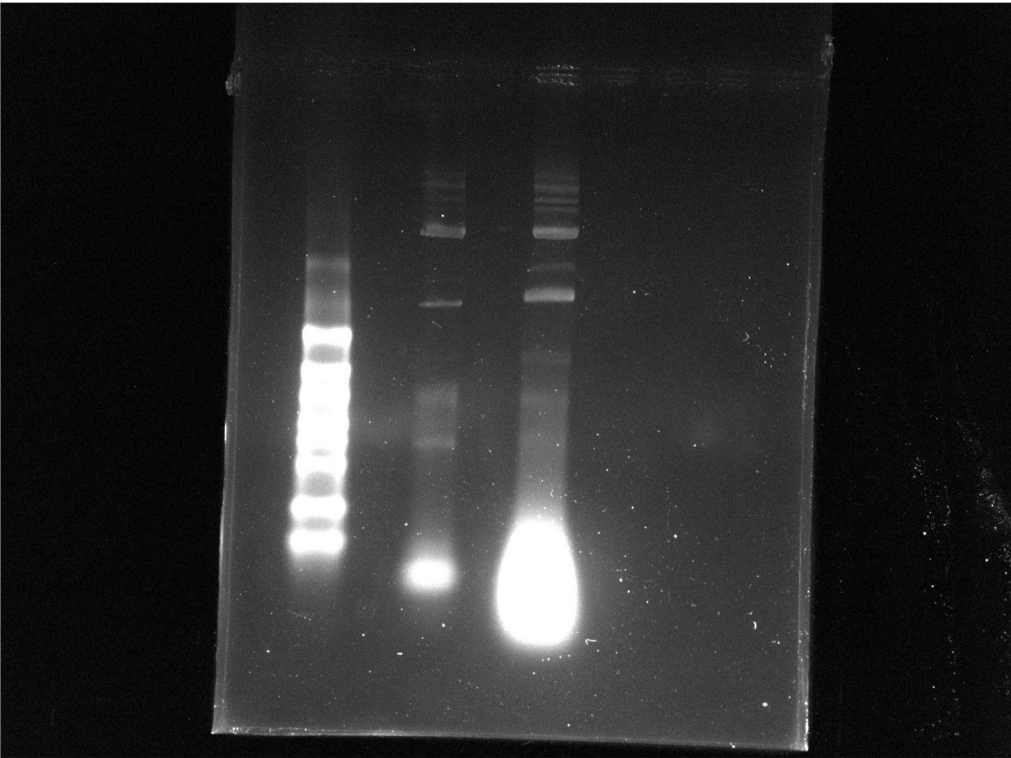

Raw Image  
for Figure 2B

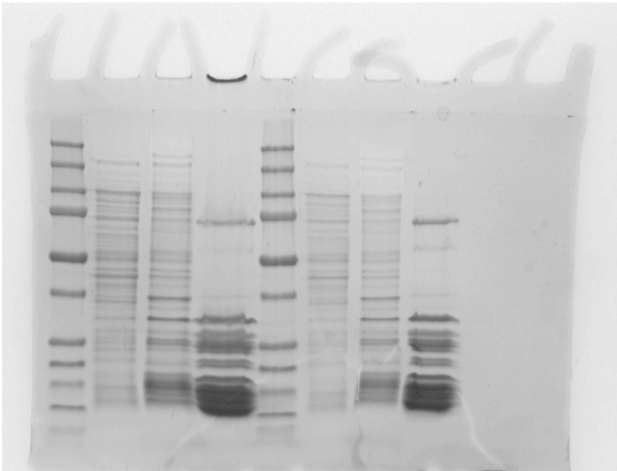

Biorad gel Imaging system was used to capture the gel images
